# Supplementary material for: meso-Carbazole decorated BODIPYs – an electron donor–acceptor system with excellent fluorosolvato/vapochromic behavior, aggregation-induced emission, and antileishmanial activity
Source: Royal Society of Chemistry journal article supplement (doi:10.1039/d3nj00747b), 2023-01-01
Supplement: d3nj00747b1.pdf [file d3nj00747b1.pdf]

### Supplementary Information for New Journal of Chemistry

#### **Meso-Carbazole decorated BODIPYs - an Electron Donor-Acceptor System with Excellent FluoroSolvato/Vapochromic Behavior, Aggregation-Induced Emission and Antileishmanial Activity**

**Diana Mathew,<sup>a,c</sup> Santanu Sasidharan,<sup>b</sup> Prakash Saudagar,<sup>b</sup> Subramaniam Sujatha,<sup>a\*</sup> and Pattiyil Parameswaran<sup>c\*</sup>**

<sup>a</sup>*Bioinorganic Materials Research Laboratory, Department of Chemistry, National Institute of Technology Calicut, Kozhikode, India-673 601.*

<sup>b</sup>*Department of Biotechnology, National Institute of Technology Warangal, Warangal, India-506004*

<sup>c</sup>*Theoretical and Computational Chemistry Laboratory, Department of Chemistry, NIT Calicut, Kozhikode, India-673601.*

#### Characterization Data

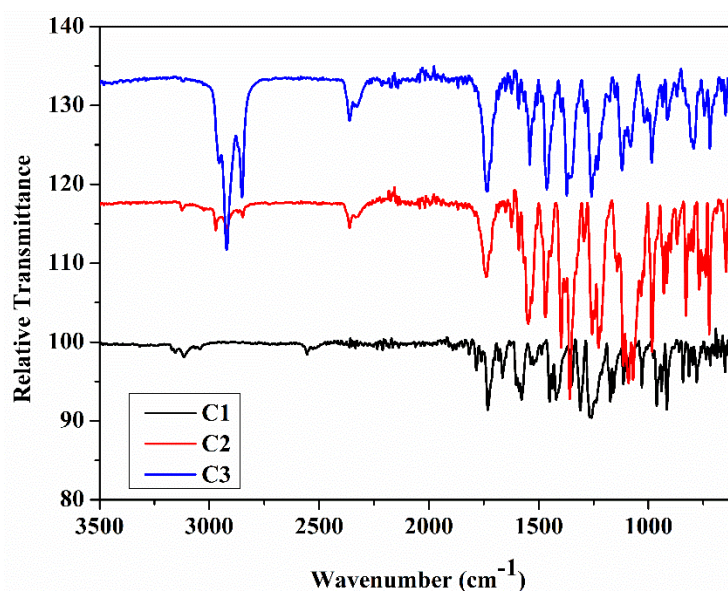

**Figure S1.** FTIR spectra of *meso*-carbazole substituted BODIPY (**C1**) and the corresponding brominated derivatives (**C2** and **C3**) at room temperature.

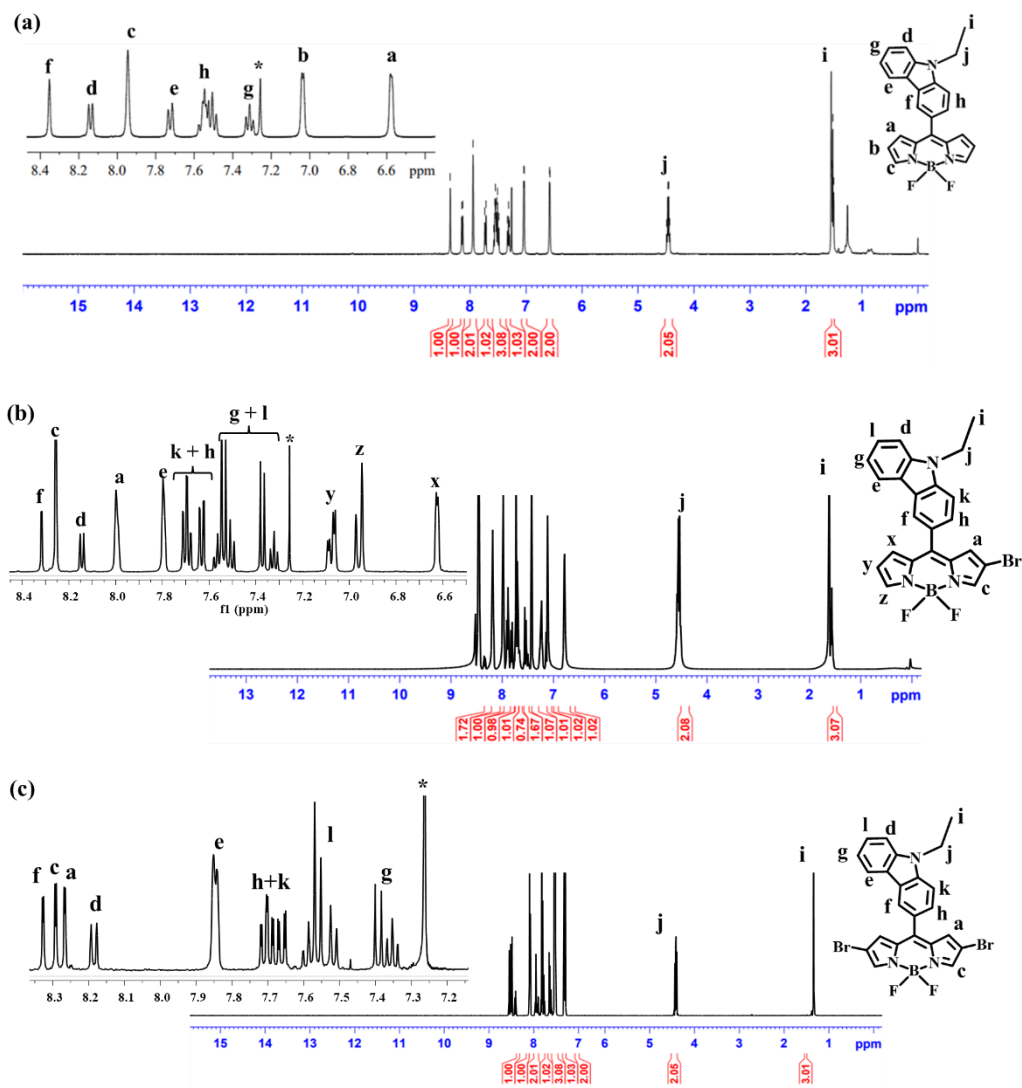

**Figure S2.**  $^1\text{H}$  NMR spectra (500 MHz,  $\text{CDCl}_3$ ) of (a) **C1**, (b) **C2** and (c) **C3** recorded at room temperature. Peaks marked with an asterisk (\*) at 7.26 ppm indicate the residual  $\text{CDCl}_3$ .

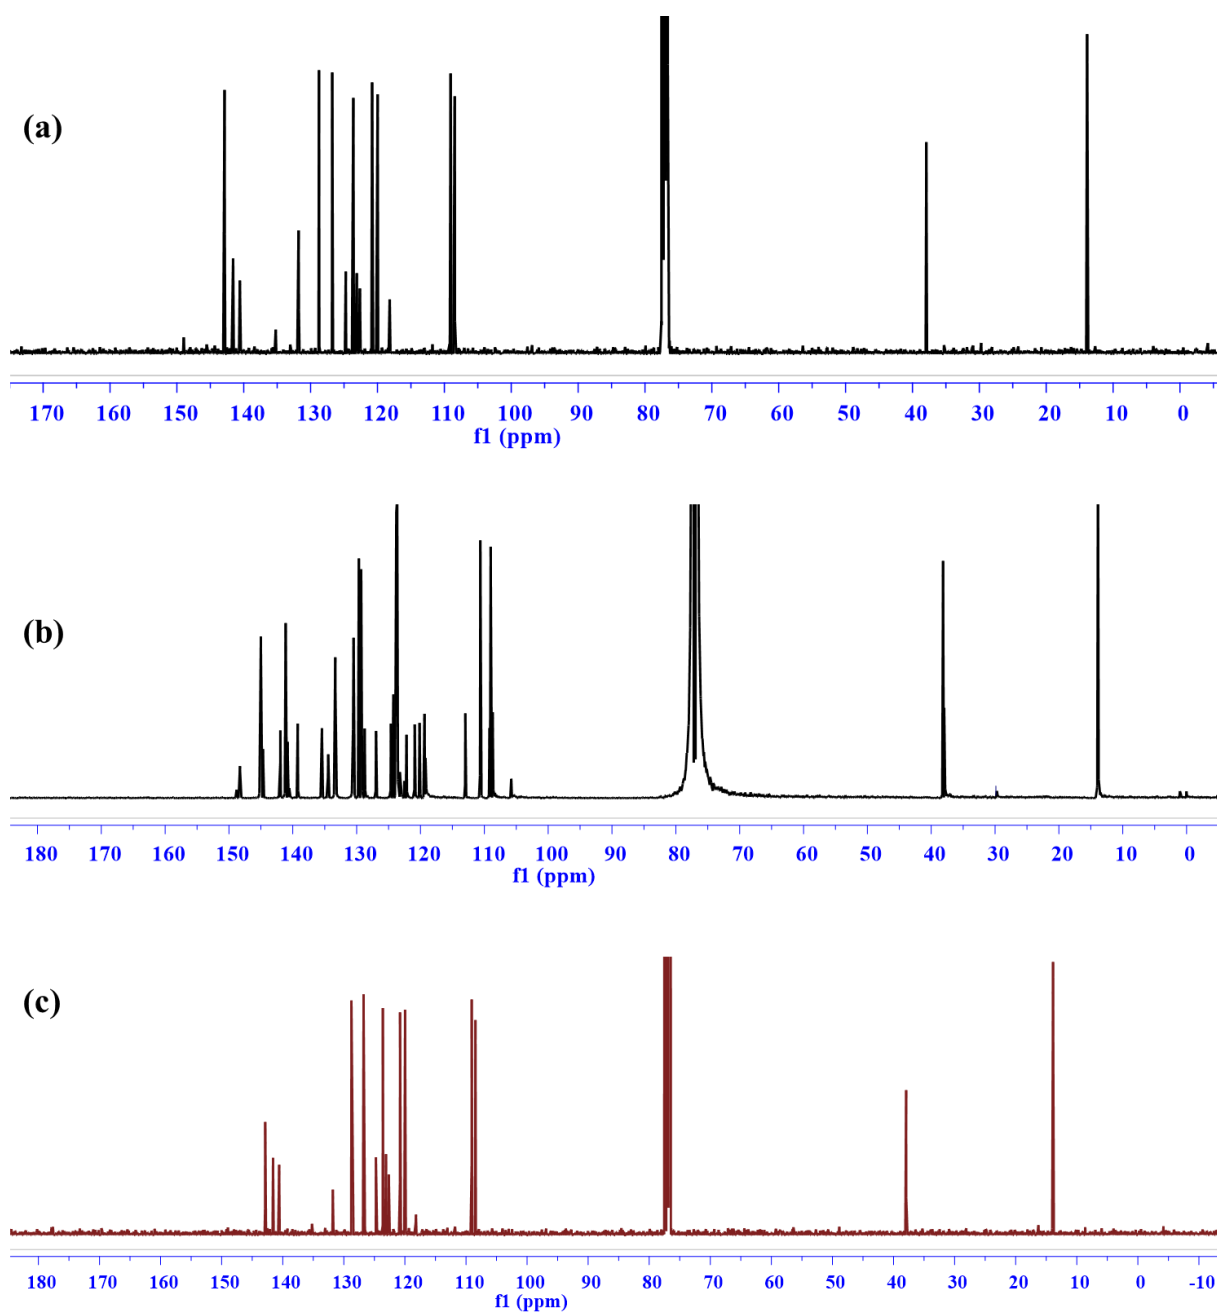

**Figure S3.**  $^{13}\text{C}$  NMR spectra (500 MHz,  $\text{CDCl}_3$ ) of (a) **C1** (b) **C2** and (c) **C3** recorded at room temperature.

(a)

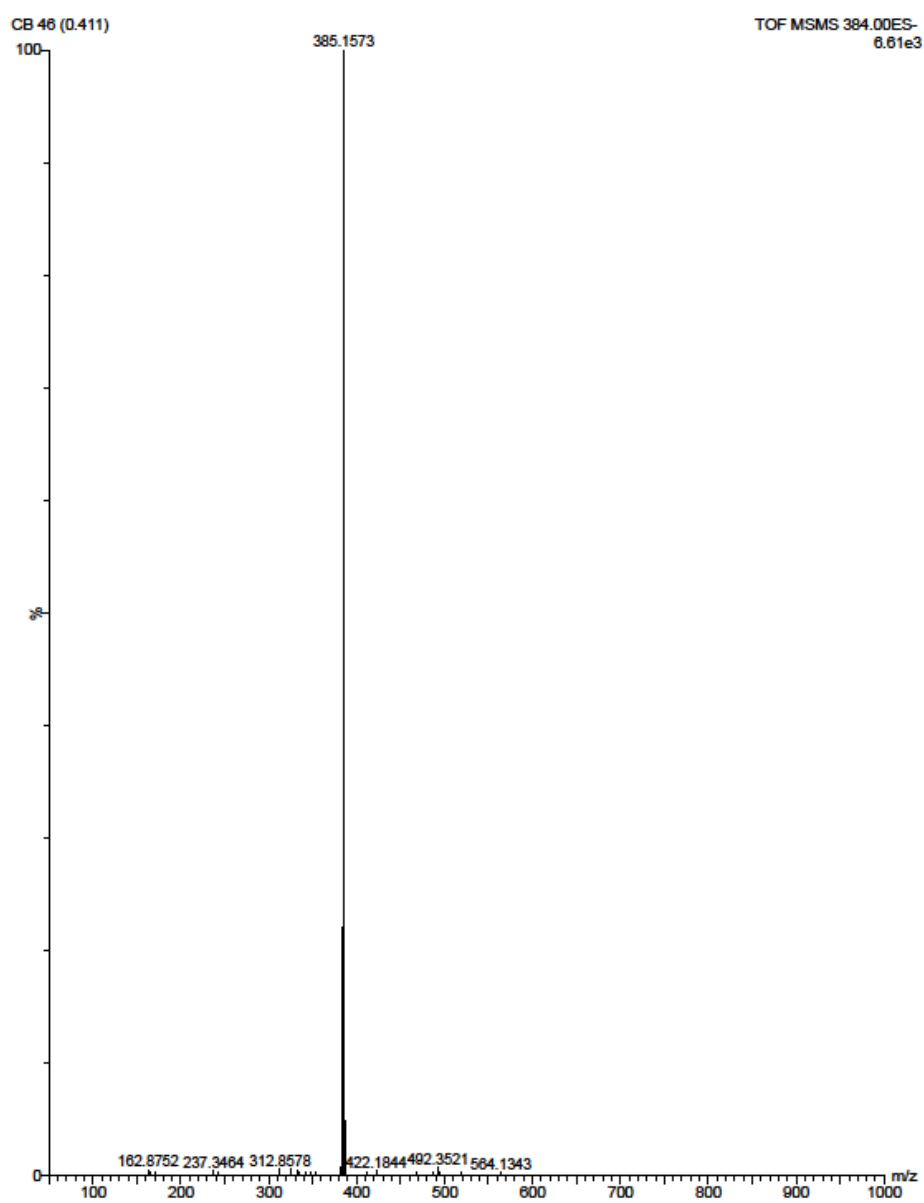

(b)

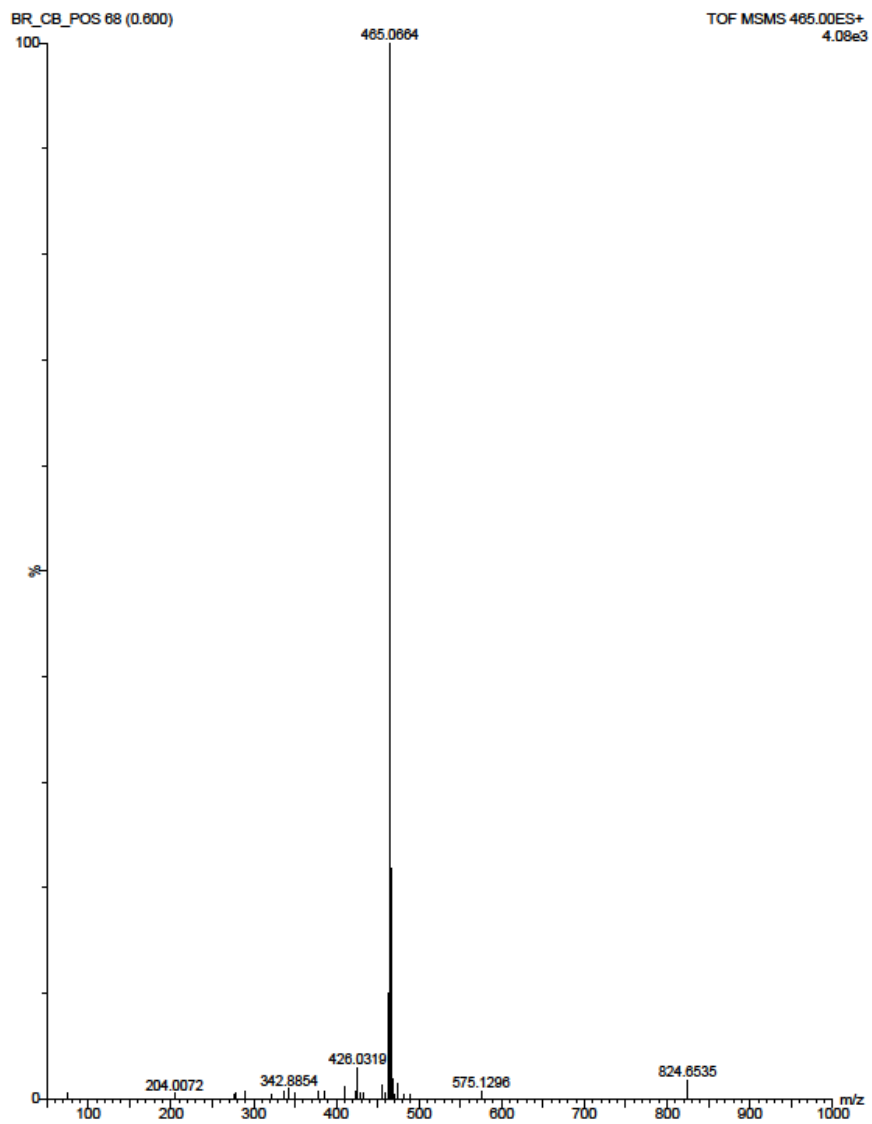

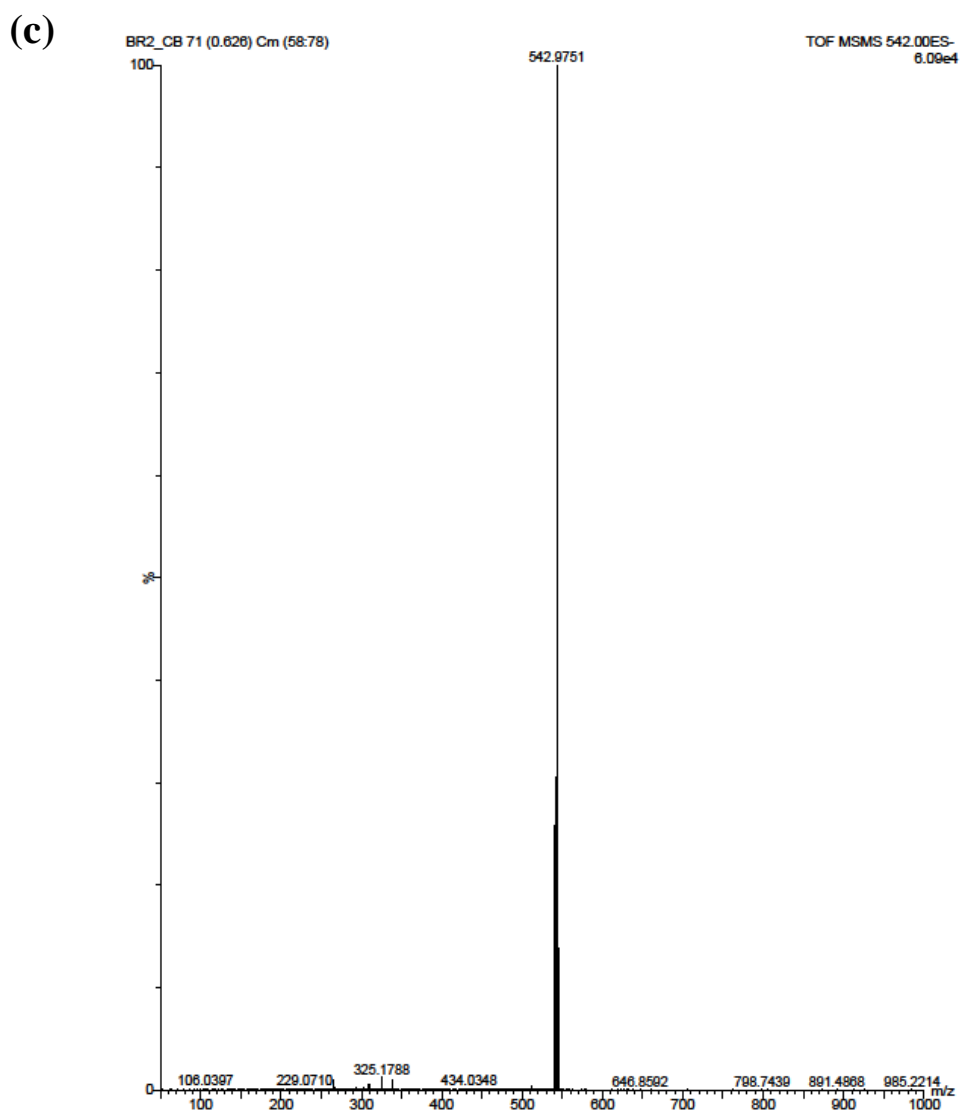

**Figure S4.** HRMS mass spectra of *meso*-carbazole substituted BODIPYs (a) **C1**, (b) **C2**, and (c) **C3** recorded in methanol.

**Table S1.** The crystallographic data of BODIPY **C1**

| Parameters               | <b>C1</b>                                                       |
|--------------------------|-----------------------------------------------------------------|
| Molecular Formula        | C <sub>23</sub> H <sub>18</sub> B F <sub>2</sub> N <sub>3</sub> |
| Formula Number           | 385.21                                                          |
| CCDC number              | 2235136                                                         |
| Temperature/K            | 296 K                                                           |
| Crystal system           | Monoclinic                                                      |
| Space group              | P 21/c                                                          |
| $\Lambda$                | 0.1073                                                          |
| a (Å)                    | 13.8926(4)                                                      |
| b (Å)                    | 18.2905(10)                                                     |
| c (Å)                    | 7.7364(7)                                                       |
| $\alpha$ (degree)        | 90                                                              |
| $\beta$ (degree)         | 99.426(2)                                                       |
| $\gamma$ (degree)        | 90                                                              |
| Volume/(Å <sup>3</sup> ) | 1939.3(2)                                                       |

|                                                                                 |                                                      |
|---------------------------------------------------------------------------------|------------------------------------------------------|
| Z                                                                               | 4                                                    |
| $\mu / \text{mm}^{-1}$                                                          | 0.092                                                |
| Density <sub>calcd</sub> / $\text{mg m}^{-3}$                                   | 1.319                                                |
| F (000)                                                                         | 800.0                                                |
| $\theta$ range (°)                                                              | 2.227 to 24.994°.                                    |
| R <sub>int</sub>                                                                | 0.0487                                               |
| Data / restraints / parameters                                                  | 3424 / 0 / 264                                       |
| GOF on F2                                                                       | 1.004                                                |
| R <sub>1</sub> <sup>a</sup> , wR <sub>2</sub> <sup>b</sup> [ $I > 2\sigma(I)$ ] | R <sub>1</sub> = 0.0487,<br>wR <sub>2</sub> = 0.1089 |
| R <sub>1</sub> , wR <sub>2</sub> (all data)                                     | R <sub>1</sub> = 0.1193,<br>wR <sub>2</sub> = 0.1479 |

**Table S2.** Selected bond lengths (Å) and bond angles (degree) of BODIPY C1

| Parameters                          | C1       |
|-------------------------------------|----------|
| C <sub>Bod</sub> -C <sub>Aryl</sub> | 1.472(3) |
| B-N1                                | 1.521(4) |
| N1-B-N2                             | 106.0(2) |
| F1-B-F2                             | 108.5(2) |
| $\Phi_{\text{Aryl}}$                | 46.0(3)  |
| $\Phi_{\text{pyrrole}}$             | 178.5(2) |

### Photophysical Data

**Table S3.** Photophysical properties of carbazole.

| Compound  | Dielectric Constant | Solvent           | $\lambda_{\text{max}}$ (nm) | log $\epsilon$ | $\lambda_{\text{em}}$ (nm) | $\Phi_{\text{f}}$ <sup>a</sup> | $\Delta\nu$ (nm) <sup>b</sup> |
|-----------|---------------------|-------------------|-----------------------------|----------------|----------------------------|--------------------------------|-------------------------------|
| Carbazole | 1.9                 | Hexane            | 293                         | 3.13           | 360                        | 0.20                           | 18                            |
|           | 2.38                | Toluene           | 292                         | 3.10           | 358                        | 0.21                           | 16                            |
|           | 4.81                | Chloroform        | 292                         | 3.12           | 368                        | 0.24                           | 26                            |
|           | 6.02                | Ethyl Acetate     | 290                         | 3.14           | 366                        | 0.26                           | 27                            |
|           | 7.58                | THF               | 289                         | 3.15           | 365                        | 0.25                           | 22                            |
|           | 17.9                | Isopropyl alcohol | 290                         | 3.16           | 360                        | 0.24                           | 20                            |
|           | 20.7                | Acetone           | 289                         | 3.14           | 359                        | 0.27                           | 18                            |
|           | 24.5                | Ethanol           | 293                         | 3.13           | 358                        | 0.28                           | 16                            |
|           | 32.7                | Methanol          | 290                         | 3.12           | 360                        | 0.30                           | 19                            |
|           | 37.5                | Acetonitrile      | 293                         | 3.11           | 362                        | 0.25                           | 21                            |
|           | 46.7                | DMSO              | 290                         | 3.13           | 361                        | 0.27                           | 19                            |

<sup>a</sup>Fluorescence quantum yield ( $\Phi_{\text{f}}$ ) was calculated using the standard fluorescein in aqueous NaOH (0.1 N) ( $\Phi_{\text{f}}$  = 0.90); <sup>b</sup>Stokes shift.

**Table S4.** Photophysical properties of *meso*-carbazole substituted BODIPY C1 and its brominated derivatives C2 and C3.

| BODIPY | Dielectric Constant | Solvent           | $\lambda_{\text{max}}$ (nm) | log $\epsilon$ | $\lambda_{\text{em}}$ (nm) | $\Phi_{\text{f}}$ <sup>a</sup> | Q <sup>b</sup> (%) | $\Delta\nu$ (nm) <sup>c</sup> | $\Delta f$ <sup>d</sup> | k <sub>r</sub> <sup>e</sup> (10 <sup>9</sup> s <sup>-1</sup> ) | k <sub>nr</sub> <sup>f</sup> (10 <sup>9</sup> s <sup>-1</sup> ) | $\tau$ <sup>g</sup> (ns) |
|--------|---------------------|-------------------|-----------------------------|----------------|----------------------------|--------------------------------|--------------------|-------------------------------|-------------------------|----------------------------------------------------------------|-----------------------------------------------------------------|--------------------------|
| C1     | 1.9                 | Hexane            | 499                         | 4.49           | 507                        | 0.51                           | -                  | 8                             | 0.0012                  | 2.55                                                           | 2.45                                                            | 0.2                      |
|        | 2.38                | Toluene           | 498                         | 4.53           | 520                        | 0.53                           | -                  | 22                            | 0.014                   | -                                                              | -                                                               | -                        |
|        | 4.81                | CHCl <sub>3</sub> | 498                         | 4.42           | 578                        | 0.62                           | -                  | 80                            | 0.1447                  | -                                                              | -                                                               | -                        |

|           |      |                   |     |      |          |       |      |     |        |        |      |       |
|-----------|------|-------------------|-----|------|----------|-------|------|-----|--------|--------|------|-------|
|           | 6.02 | Ethyl Acetate     | 497 | 4.15 | 610      | 0.32  | -    | 113 | 0.2005 | -      | -    | -     |
|           | 7.58 | THF               | 496 | 4.38 | 607      | 0.21  | 16   | 111 | 0.2107 | 0.31   | 1.21 | 0.659 |
|           | 17.9 | Isopropyl alcohol | 495 | 4.12 | 623      | 0.05  | 79   | 128 | -      | -      | -    | -     |
|           | 20.7 | Acetone           | 496 | 4.23 | 634      | 0.05  | 81.4 | 138 | 0.2846 | 0.049  | 0.93 | 1.02  |
|           | 24.5 | Ethanol           | 494 | 4.22 | 510, 641 | 0.04  | 85.7 | 147 | 0.2884 | -      | -    | -     |
|           | 32.7 | Methanol          | 493 | 4.51 | 507, 652 | 0.02  | 93.3 | 159 | 0.3086 | -      | -    | -     |
|           | 37.5 | Acetonitrile      | 494 | 4.65 | 506, 659 | 0.03  | 88   | 165 | 0.3055 | -      | -    | -     |
|           | 46.7 | DMSO              | 493 | 4.43 | 507, 675 | 0.02  | 92.5 | 182 | 0.26   | 0.006  | 0.31 | 3.14  |
| <b>C2</b> | 1.9  | Hexane            | 516 | 4.12 | 527      | 0.40  | -    | 11  | 0.0012 | 2.7    | 4.09 | 0.147 |
|           | 2.38 | Toluene           | 516 | 4.35 | 548      | 0.42  | -    | 32  | 0.0126 | -      | -    | -     |
|           | 4.81 | Chloroform        | 515 | 4.24 | 587      | 0.51  | -    | 72  | 0.1447 | -      | -    | -     |
|           | 6.02 | Ethyl Acetate     | 514 | 4.44 | 619      | 0.36  | -    | 105 | 0.2005 | -      | -    | -     |
|           | 7.58 | THF               | 513 | 4.18 | 618      | 0.46  | -    | 105 | 0.2107 | 1.6    | 1.9  | 0.275 |
|           | 17.9 | Isopropyl alcohol | 511 | 4.11 | 631      | 0.05  | 79.1 | 120 | -      | -      | -    | -     |
|           | 20.7 | Acetone           | 512 | 4.21 | 646      | 0.05  | 81.4 | 134 | 0.2846 | 0.037  | 0.71 | 1.33  |
|           | 24.5 | Ethanol           | 510 | 4.30 | 520, 658 | 0.05  | 82.1 | 148 | 0.2884 | -      | -    | -     |
|           | 32.7 | Methanol          | 510 | 4.23 | 525, 667 | 0.02  | 93.3 | 157 | 0.3086 | -      | -    | -     |
|           | 37.5 | Acetonitrile      | 507 | 3.99 | 523, 670 | 0.02  | 92   | 163 | 0.3055 | -      | -    | -     |
|           | 46.7 | DMSO              | 508 | 4.28 | 527, 676 | 0.01  | 96.2 | 168 | 0.26   | 0.005  | 0.49 | 2.0   |
| <b>C3</b> | 1.9  | Hexane            | 533 | 3.98 | 549      | 0.11  | 45   | 16  | 0.0012 | 0.017  | 1.76 | 0.659 |
|           | 2.38 | Toluene           | 532 | 4.19 | 550      | 0.08  | 61.9 | 18  | 0.0126 | -      | -    | -     |
|           | 4.81 | Chloroform        | 534 | 4.32 | 551      | 0.06  | 75   | 19  | 0.1447 | -      | -    | -     |
|           | 6.02 | Ethyl Acetate     | 529 | 4.46 | 559      | 0.05  | 80.7 | 30  | 0.2005 | -      | -    | -     |
|           | 7.58 | THF               | 528 | 3.97 | 556      | 0.03  | 88   | 28  | 0.2107 | 0.042  | 1.38 | 0.698 |
|           | 17.9 | Isopropyl alcohol | 527 | 4.10 | 557      | 0.002 | 99.1 | 30  | -      | -      | -    | -     |
|           | 20.7 | Acetone           | 526 | 4.11 | 553      | 0.01  | 96.4 | 27  | 0.2846 | 0.017  | 1.76 | 0.562 |
|           | 24.5 | Ethanol           | 525 | 4.26 | 554      | 0.02  | 93.3 | 29  | 0.2884 | -      | -    | -     |
|           | 32.7 | Methanol          | 527 | 4.50 | 548      | 0.002 | 99.2 | 21  | 0.3086 | -      | -    | -     |
|           | 46.7 | DMSO              | 526 | 4.36 | 557      | 0.001 | 99.6 | 31  | 0.3055 | 0.0016 | 1.63 | 0.612 |

<sup>a</sup>Fluorescence quantum yield ( $\Phi_f$ ) was calculated using the standard fluorescein in aqueous NaOH (0.1 N) ( $\Phi_f = 0.90$ ); <sup>b</sup>Quenching Efficiency (Q): (*Phys. Chem. Chem. Phys.*, 2018, **20**, 27418);

$$Q = \frac{\Phi_{(\text{Ref})} - \Phi_{(\text{BODIPY})}}{\Phi_{(\text{Ref})}}$$

<sup>c</sup>Stokes shift; <sup>d</sup>Oriental polarizability: (*J. Mater. Chem. C*, 2017, **5**, 6136-6143; *J. Chem. Phys.*, 2006, **125**, 054513). <sup>e</sup>Radiative ( $k_r = \Phi_f / \tau$ ) and <sup>f</sup>non-radiative ( $k_{nr} = (1 - \Phi_f) / \tau$ ) decay rates; <sup>g</sup>fluorescence lifetime.



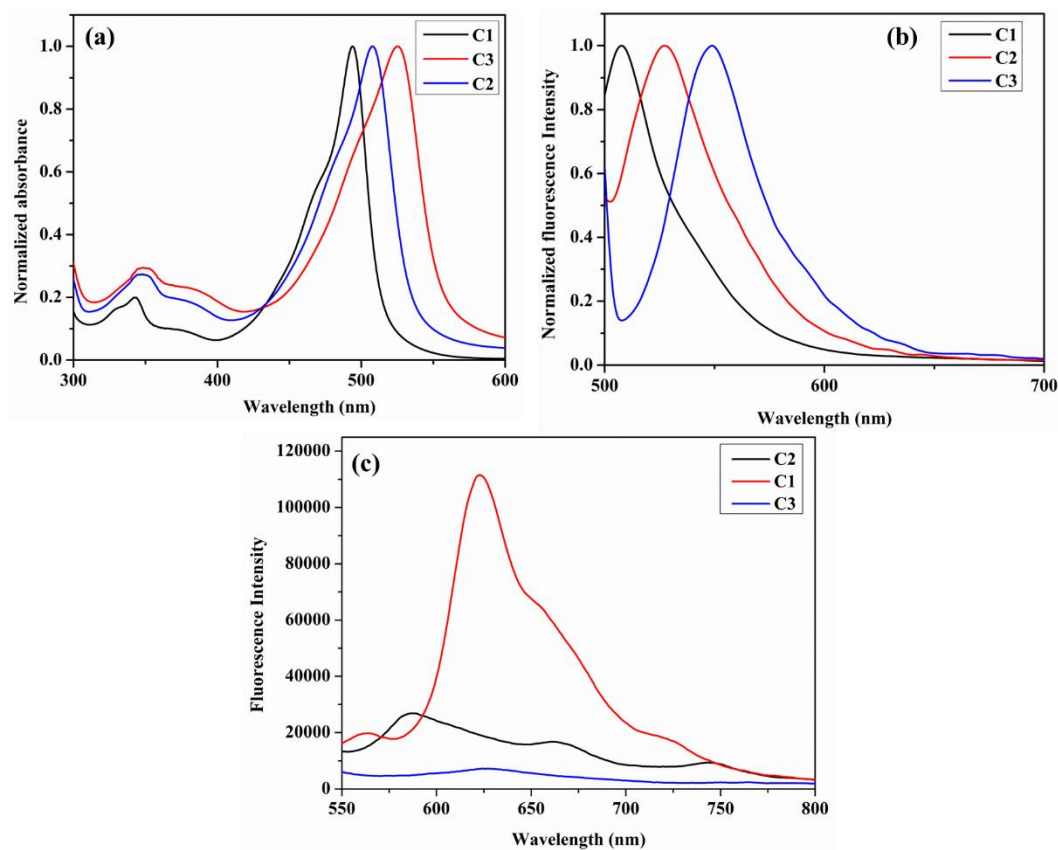

**Figure S5.** (a) Normalized absorption ( $10^{-5}$  M) and (b) emission spectra ( $10^{-7}$  M,  $\lambda_{ex} = 480$  nm) of *meso*-carbazole appended BODIPYs **C1**, **C2**, and **C3** in hexane at room temperature; (c) Solid-state fluorescence spectra of **C1**, **C2**, and **C3** ( $\lambda_{ex} = 500$  nm).

### Theoretical Calculations

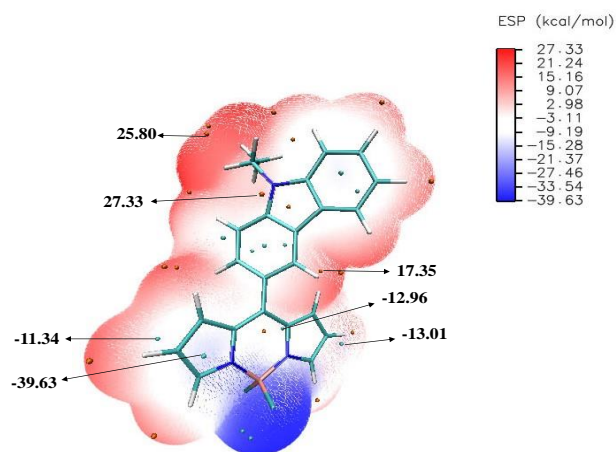

**Figure S6.** MESP of *meso*-carbazole substituted BODIPY **C1** calculated at M06/def2-TZVPP//BP86/def2-TZVPP level of theory.

**Table S5.** ESP values (M06/def2-TZVPP//BP86/def2-TZVPP) in kcal/mol at the Van der Waals surface of selected atoms in *meso*-carbazole substituted BODIPY C1.

| Atoms                    | ESP (kcal/mol) |
|--------------------------|----------------|
| Carbazole Carbon atoms   |                |
| C2                       | -4.50          |
| C4                       | -7.14          |
| C6                       | -8.38          |
| C8                       | -7.08          |
| C13                      | -0.89          |
| C15                      | -3.40          |
| C18                      | -3.66          |
| Pyrrole Carbon atoms     |                |
| C22 ( $\beta$ -pyrrole)  | -8.15          |
| C24 ( $\beta$ -pyrrole)  | -10.04         |
| C26 ( $\alpha$ -pyrrole) | -10.32         |

**Table S6.** Computed absorption properties of *meso*-carbazole BODIPY in the ground state in DMSO using PCM solvent model at M06/def2TZVPP//BP86/def2-TZVPP.

| BODIPY                                | Excited state | Oscillator strength (f) | Excitation energy (eV) | $\lambda$ (nm) | Transition  | Coefficient of transition | Percentage contribution |        |             |         |       |
|---------------------------------------|---------------|-------------------------|------------------------|----------------|-------------|---------------------------|-------------------------|--------|-------------|---------|-------|
| <b>C1</b><br>$\lambda_{exp} = 493$ nm | 1             | 0.2563                  | 2.52                   | 490.47         | HOMO→LUMO   | 0.6990                    | 97.72                   |        |             |         |       |
|                                       | 2             | 0.1309                  | 2.82                   | 439.08         | HOMO-2→LUMO | 0.4960                    | 49.20                   |        |             |         |       |
|                                       |               |                         |                        |                | HOMO-1→LUMO | 0.4944                    | 48.88                   |        |             |         |       |
|                                       | 3             | 0.3788                  | 2.90                   | 426.91         | HOMO-2→LUMO | 0.4940                    | 48.80                   |        |             |         |       |
|                                       |               |                         |                        |                | HOMO-1→LUMO | -0.4944                   | 48.88                   |        |             |         |       |
|                                       | 4             | 0.0658                  | 3.63                   | 341.02         | HOMO-4→LUMO | 0.6577                    | 86.51                   |        |             |         |       |
|                                       |               |                         |                        |                | HOMO-5→LUMO | -0.2264                   | 10.25                   |        |             |         |       |
|                                       |               |                         |                        |                | 5           | 0.0993                    | 3.81                    | 325.18 | HOMO-5→LUMO | 0.1480  | 4.38  |
|                                       |               |                         |                        |                |             |                           |                         |        | HOMO-4→LUMO | 0.2047  | 8.38  |
| 5                                     | 0.0993        | 3.81                    | 325.18                 | HOMO-3→LUMO    | 0.5334      | 56.90                     |                         |        |             |         |       |
|                                       |               |                         |                        | HOMO→LUMO+1    | -0.3551     | 25.21                     |                         |        |             |         |       |
| <b>C2</b><br>$\lambda_{exp} = 508$ nm | 1             | 0.2626                  | 2.44                   | 508.05         | HOMO→LUMO   | 0.6990                    | 97.72                   |        |             |         |       |
|                                       | 2             | 0.1473                  | 2.72                   | 458.44         | HOMO-2→LUMO | 0.4840                    | 46.85                   |        |             |         |       |
|                                       |               |                         |                        |                | HOMO-1→LUMO | 0.5057                    | 51.14                   |        |             |         |       |
|                                       | 3             | 0.3722                  | 2.79                   | 443.32         | HOMO-1→LUMO | 0.5062                    | 51.24                   |        |             |         |       |
|                                       |               |                         |                        |                | HOMO-2→LUMO | -0.4788                   | 45.84                   |        |             |         |       |
|                                       | 4             | 0.1415                  | 3.50                   | 353.71         | HOMO-4→LUMO | -0.1023                   | 2.09                    |        |             |         |       |
|                                       |               |                         |                        |                | HOMO-3→LUMO | 0.2212                    | 9.78                    |        |             |         |       |
|                                       |               |                         |                        |                | 5           | 0.0448                    | 3.70                    | 334.51 | HOMO-2→LUMO | 0.6487  | 84.16 |
|                                       |               |                         |                        |                |             |                           |                         |        | HOMO→LUMO   | -0.1029 | 2.11  |
| 5                                     | 0.0448        | 3.70                    | 334.51                 | HOMO-4→LUMO    | 0.6923      | 95.85                     |                         |        |             |         |       |
|                                       |               |                         |                        | HOMO→LUMO      | 0.7007      | 98.19                     |                         |        |             |         |       |
| <b>C3</b><br>$\lambda_{exp} = 526$ nm | 1             | 0.2732                  | 2.35                   | 526.87         | HOMO→LUMO   | 0.7007                    | 98.19                   |        |             |         |       |
|                                       | 2             | 0.1337                  | 2.63                   | 470.15         | HOMO-2→LUMO | 0.4966                    | 49.32                   |        |             |         |       |
|                                       |               |                         |                        |                | HOMO-1→LUMO | 0.4953                    | 49.06                   |        |             |         |       |
|                                       | 3             | 0.4120                  | 2.68                   | 461.49         | HOMO-4→LUMO | -0.1042                   | 2.17                    |        |             |         |       |
|                                       |               |                         |                        |                | HOMO-1→LUMO | 0.4945                    | 48.90                   |        |             |         |       |
|                                       |               |                         |                        |                | HOMO-2→LUMO | -0.4919                   | 48.39                   |        |             |         |       |
|                                       | 4             | 0.0786                  | 3.42                   | 361.64         | HOMO-5→LUMO | 0.2361                    | 11.14                   |        |             |         |       |
|                                       |               |                         |                        |                | HOMO-3→LUMO | 0.6546                    | 85.70                   |        |             |         |       |
|                                       |               |                         |                        |                | 5           | 0.1795                    | 3.47                    | 356.28 | HOMO-4→LUMO | 0.6890  | 94.94 |
| HOMO-1→LUMO                           | -0.1039       | 2.15                    |                        |                |             |                           |                         |        |             |         |       |

**Table S7.** Computed absorption properties of *meso*-carbazole BODIPY (dihedral angle = 90°) in DMSO using PCM solvent model at M06/def2TZVPP//BP86/def2-TZVPP.

| BODIPY    | Excited state             | Oscillator strength (f)   | Excitation energy (eV) | $\lambda$ (nm) | Transition                | Coefficient of transition | Percentage contribution |        |
|-----------|---------------------------|---------------------------|------------------------|----------------|---------------------------|---------------------------|-------------------------|--------|
| <b>C1</b> | 1                         | 0.0008                    | 2.33                   | 530.37         | HOMO-3 $\rightarrow$ LUMO | -0.1076                   | 2.31                    |        |
|           |                           |                           |                        |                | HOMO $\rightarrow$ LUMO   | 0.6870                    | 94.3                    |        |
|           | 2                         | 0.0757                    | 2.7                    | 457.79         | HOMO-2 $\rightarrow$ LUMO | 0.3064                    | 18.7                    |        |
|           |                           |                           |                        |                | HOMO-1 $\rightarrow$ LUMO | 0.6227                    | 77.5                    |        |
|           |                           |                           |                        |                | HOMO $\rightarrow$ LUMO   | -0.1155                   | 2.6                     |        |
|           | 3                         | 0.4326                    | 2.92                   | 424.33         | HOMO-4 $\rightarrow$ LUMO | -0.1189                   | 2.8                     |        |
|           |                           |                           |                        |                | HOMO-2 $\rightarrow$ LUMO | 0.6235                    | 77.7                    |        |
|           |                           |                           |                        |                | HOMO-1 $\rightarrow$ LUMO | -0.309                    | 19.09                   |        |
|           | <b>C2</b>                 | 1                         | 0.0006                 | 2.22           | 557.56                    | HOMO $\rightarrow$ LUMO   | 0.6878                  | 94.6   |
| 2         |                           |                           |                        |                |                           | 0.0654                    | 2.59                    | 476.99 |
|           |                           | HOMO-1 $\rightarrow$ LUMO | 0.6423                 | 82.5           |                           |                           |                         |        |
|           |                           | HOMO $\rightarrow$ LUMO   | -0.1109                | 2.4            |                           |                           |                         |        |
| 3         |                           | 0.4432                    | 2.79                   | 443.57         | HOMO-3 $\rightarrow$ LUMO | -0.1139                   | 2.5                     |        |
|           |                           |                           |                        |                | HOMO-2 $\rightarrow$ LUMO | 0.6409                    | 82.1                    |        |
|           |                           |                           |                        |                | HOMO-1 $\rightarrow$ LUMO | -0.2643                   | 13.9                    |        |
| <b>C3</b> |                           | 1                         | 0.0006                 | 2.11           | 587.5                     | HOMO $\rightarrow$ LUMO   | 0.6884                  | 94.7   |
|           |                           |                           |                        |                |                           | 2                         | 0.0555                  | 2.48   |
|           | HOMO-1 $\rightarrow$ LUMO | 0.6588                    | 86.8                   |                |                           |                           |                         |        |
|           | HOMO $\rightarrow$ LUMO   | 0.1074                    | 2.3                    |                |                           |                           |                         |        |
|           | 3                         | 0.4723                    | 2.67                   | 463.56         | HOMO-5 $\rightarrow$ LUMO | 0.1058                    | 2.2                     |        |
|           |                           |                           |                        |                | HOMO-2 $\rightarrow$ LUMO | 0.6574                    | 86.4                    |        |
|           |                           |                           |                        |                | HOMO-1 $\rightarrow$ LUMO | 0.2220                    | 9.8                     |        |

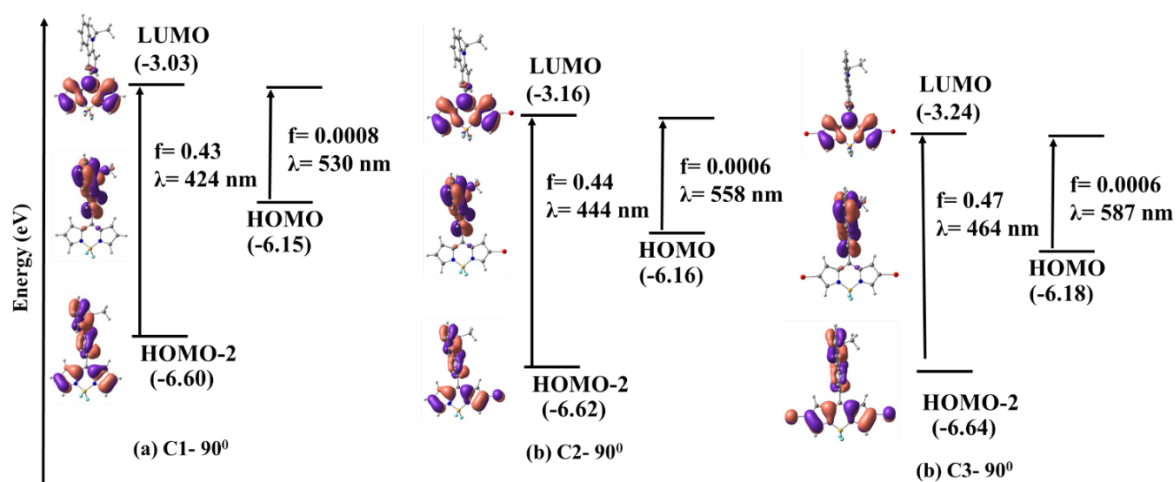

**Figure S7.** Important electronic transitions computed for *meso*-carbazole BODIPY derivatives (dihedral angle between BODIPY and carbazole planes fixed to  $90^\circ$ ) using TDDFT at M06/def2TZVPP level of theory in DMSO using PCM solvent model. Eigenvalues are given in eV. The surfaces are plotted at the iso-surface value of 0.03. The corresponding wavelength ( $\lambda$ ) in nm and oscillator strength ( $f$ ) is given.

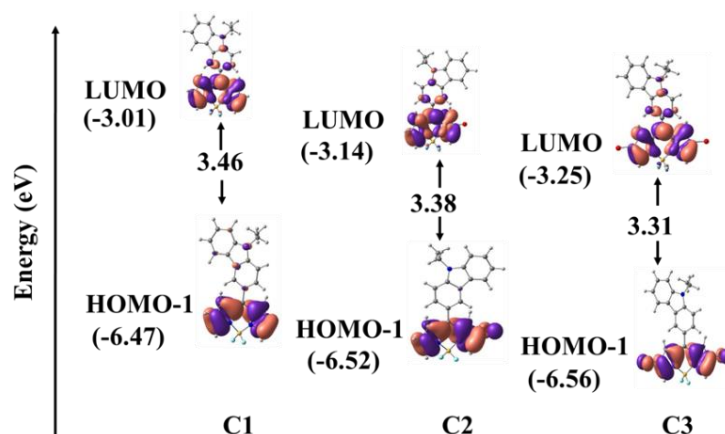

**Figure S8.** Selected molecular orbitals and energy gap of **C1**, **C2**, and **C3** in DMSO. Eigenvalues are given in eV.

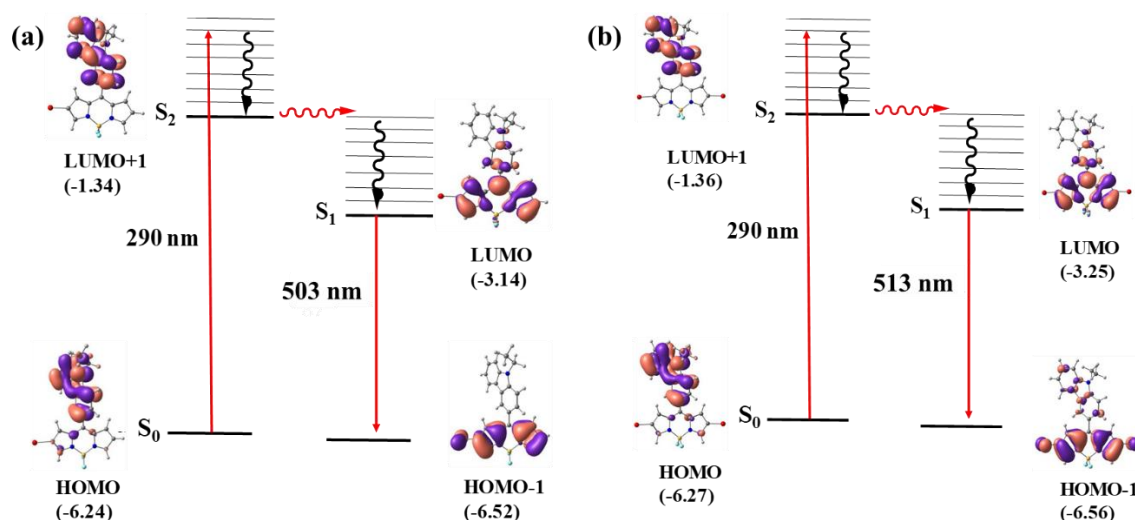

**Figure S9.** The electronic transitions in (a) **C2**, and (b) **C3**, calculated using TDDFT at the M06/def2TZVPP//BP86/def2-TZVPP level of theory, indicating intramolecular excitation energy transfer in **C2** and **C3**. Eigenvalues values are given in eV.

### Solvatochromism

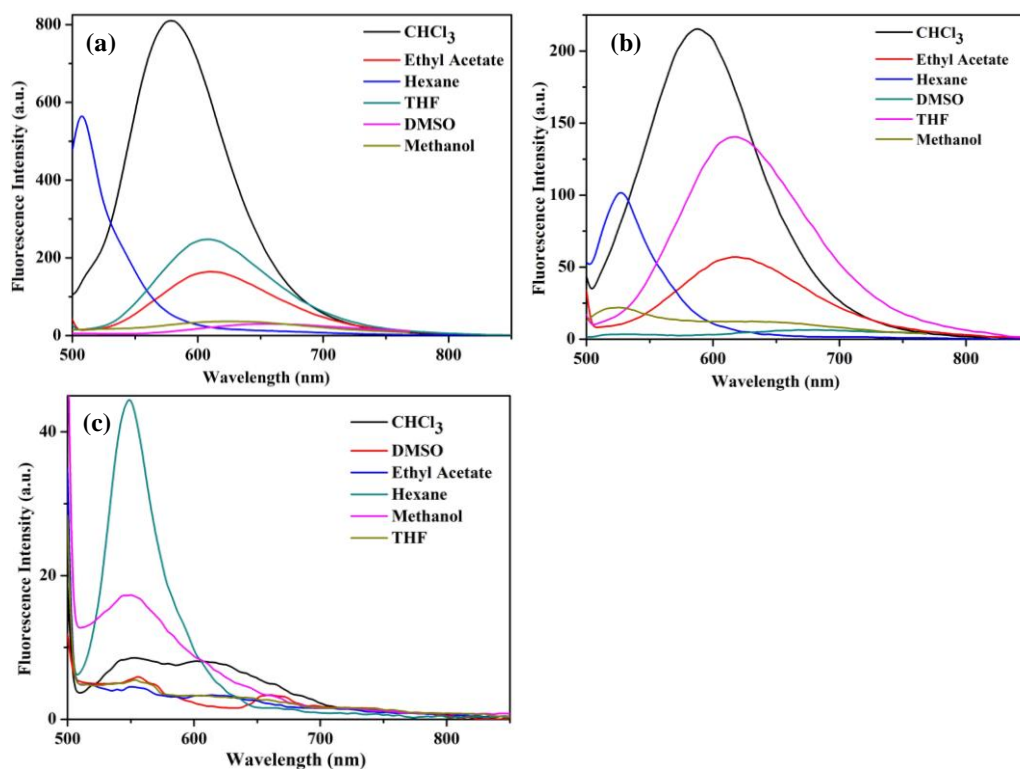

**Figure S10.** Fluorescence spectrum of (a) **C1** (b) **C2** (c) **C3** ( $10^{-7}$  M,  $\lambda_{ex} = 480$  nm) in solvents of different polarity at room temperature.

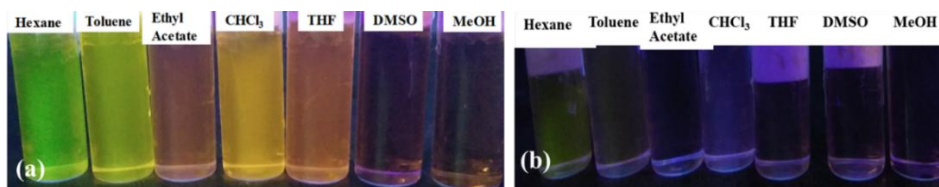

**Figure S11.** Photograph of (a) **C2** and (b) **C3** in various solvents under UV irradiation.

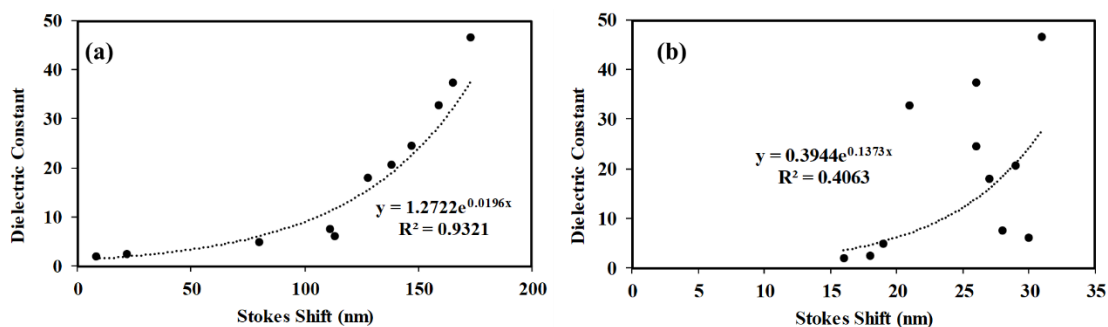

**Figure S12.** The plot of dielectric constant vs Stokes shift (nm) for (a) **C2** and (b) **C3**.

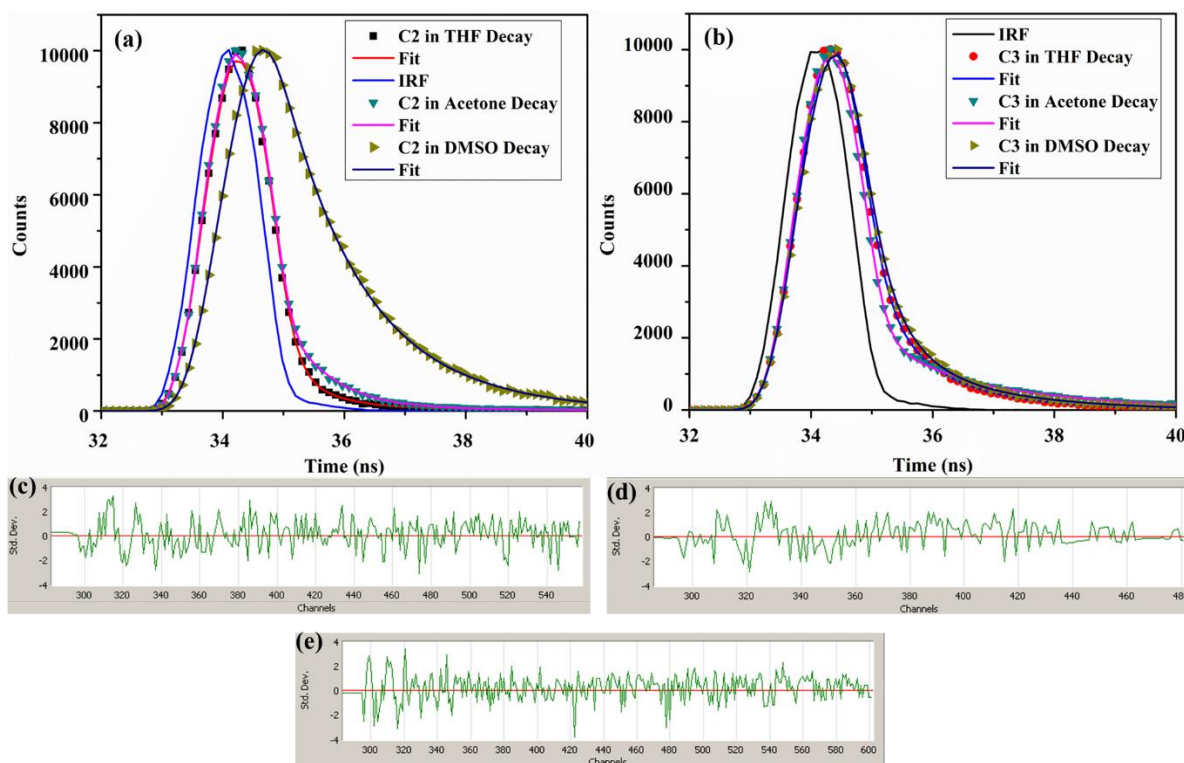

**Figure S13.** The fluorescence decay profiles of (a) **C2** and (b) **C3** ( $\lambda_{ex} = 460$  nm) in different solvents. The instrument response function, (IRF) is shown in the blue line in **C2** and a black line in **C3**. Residuals obtained from the fit of (c) **C1**, (d) **C2** and (e) **C3** in THF are given at the bottom.

**Table S8.** Fitted decay time ( $\tau_i$ ), pre-exponential coefficients ( $\alpha_i$ ), and chi-squared ( $\chi^2$ ) values were obtained by fitting the emission decays ( $\lambda_{ex} = 460$  nm).

| Solvent | C1          |            |             |          |            |             |      | $\chi^2$ | $\tau$ (ns) |
|---------|-------------|------------|-------------|----------|------------|-------------|------|----------|-------------|
|         | $\alpha_1$  | $\alpha_2$ | $\alpha_3$  | $\tau_1$ | $\tau_2$   | $\tau_3$    |      |          |             |
| THF     | 0.14947     | 0.178944   | -           | 2.08E-10 | 7.62E-10   |             | 1.35 | 0.65     |             |
| Hexane  | 6.43E-03    | 2.852009   | 6.04E-04    | 1.04E-09 | 8.09E-11   | 6.11E-09    | 1.10 | 0.2      |             |
| Acetone | 0.190875    | -          | -           | 1.02E-09 |            |             | 1.30 | 1.02     |             |
| DMSO    | 0.118504    | -          | -           | 3.14E-09 |            |             | 1.10 | 3.14     |             |
| C2      |             |            |             |          |            |             |      |          |             |
| THF     | 0.7845303   | 5.85E-03   |             | 1.94E-10 | 1.60E-09   |             | 1.22 | 0.27     |             |
| Hexane  | 8.32E+00    | 5.61E-02   | 1.34E-03    | 4.57E-11 | 7.23E-10   | 3.42E-09    | 1.32 | 0.14     |             |
| Acetone | 0.006429235 | 2.852009   | 0.000603659 | 1.04E-09 | 8.0922E-11 | 6.10806E-09 | 1.22 | 1.33     |             |
| DMSO    | 6.52E-02    | 0.111928   |             | 8.07E-10 | 1.49E-09   |             | 1.15 | 2.0      |             |
| C3      |             |            |             |          |            |             |      |          |             |
| Acetone | 0.4492571   | 3.90E-02   | -           | 2.65E-10 | 1.27E-09   | -           | 1.43 | 0.56     |             |
| DMSO    | 1.08E+00    | 2.20E-02   | -           | 1.39E-10 | 2.13E-09   | -           | 1.03 | 0.61     |             |
| Hexane  | 0.14947     | 0.178944   | -           | 2.08E-10 | 7.62E-10   | -           | 1.25 | 0.65     |             |
| THF     | 3.40E-01    | 2.99E-02   | -           | 3.55E-10 | 1.58E-09   | -           | 1.05 | 0.69     |             |

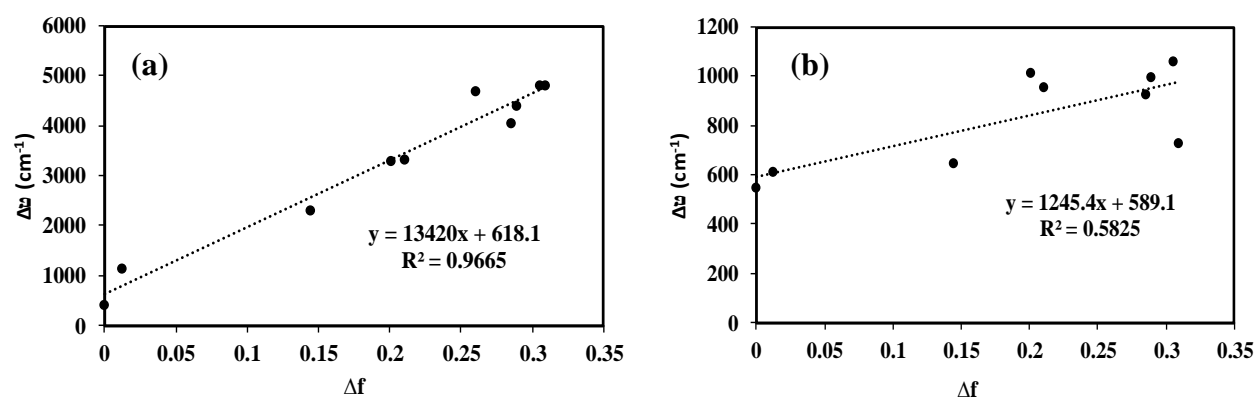

**Figure S14.** Lippert-Mataga plot: dependence of the Stokes shift on the solvent polarity function,  $\Delta f$  for (a) C2 and (b) C3.

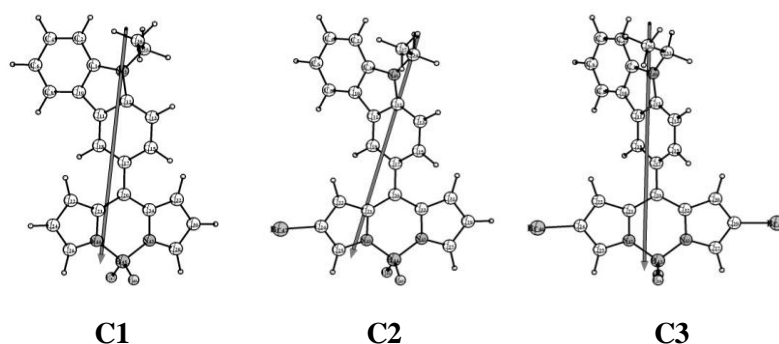

**Figure S15.** The direction of dipole moment in the optimized ground state geometry of C1, C2, and C3.

## Twisted Intramolecular Charge Transfer

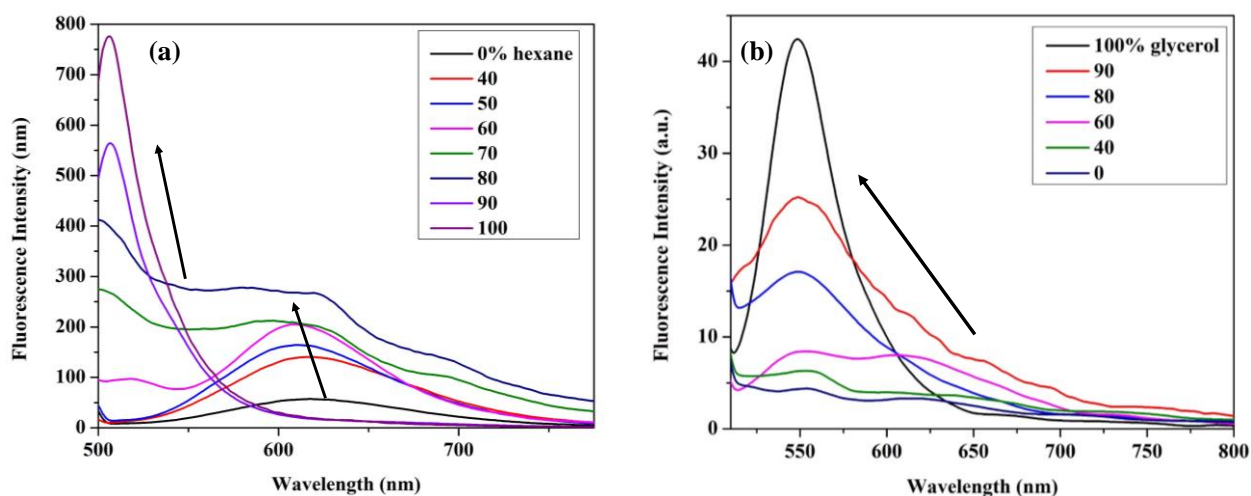

**Figure S16.** (a) Emission spectra of **C1** in the THF/hexane mixture with different hexane fractions ( $10^{-7}$  M,  $\lambda_{exc} = 480$  nm); (b) Emission spectra of **C1** in the ethanol/glycerol mixture with different glycerol fractions ( $10^{-7}$  M,  $\lambda_{exc} = 480$  nm).

## Singlet Oxygen Generation: Chemical Quenching with DPBF

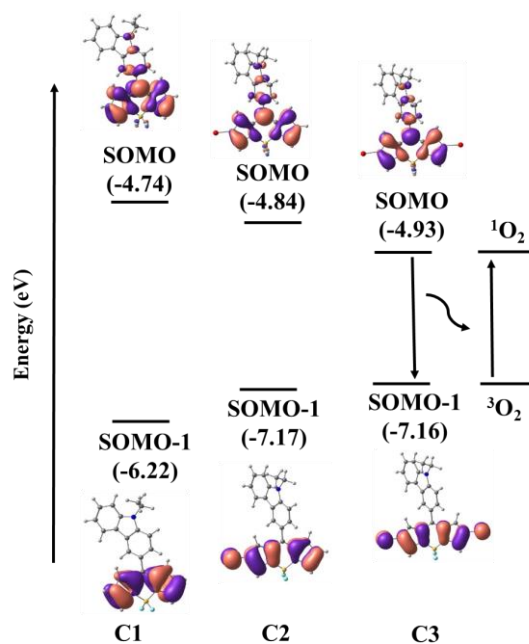

**Figure S17.** The singly occupied molecular orbitals and the energy gap between SOMO and SOMO-1 orbitals in *meso*-carbazole BODIPY are given. The mechanism of singlet oxygen generation is illustrated. Eigenvalues are given in eV. The surfaces are plotted at the iso-surface value of 0.03.



## Aggregation-Induced Emission Studies

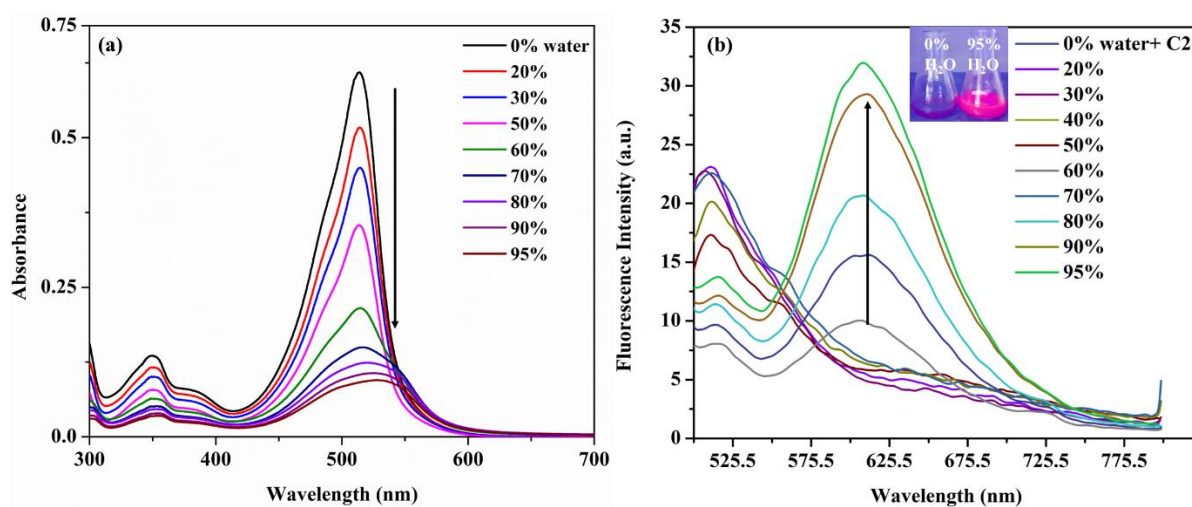

**Figure S18.** (a) Absorption spectra of **C2** in DMSO-H<sub>2</sub>O mixtures with different water fractions (10<sup>-5</sup> M); (b) Fluorescence spectra of **C2** in DMSO-H<sub>2</sub>O mixtures with different water fractions (10<sup>-6</sup> M,  $\lambda_{exc} = 480$  nm) (Inset: photograph of **C2** in DMSO/H<sub>2</sub>O mixture ( $f_w = 0\%$  and 95%), taken under 365 nm excitation of a UV lamp).

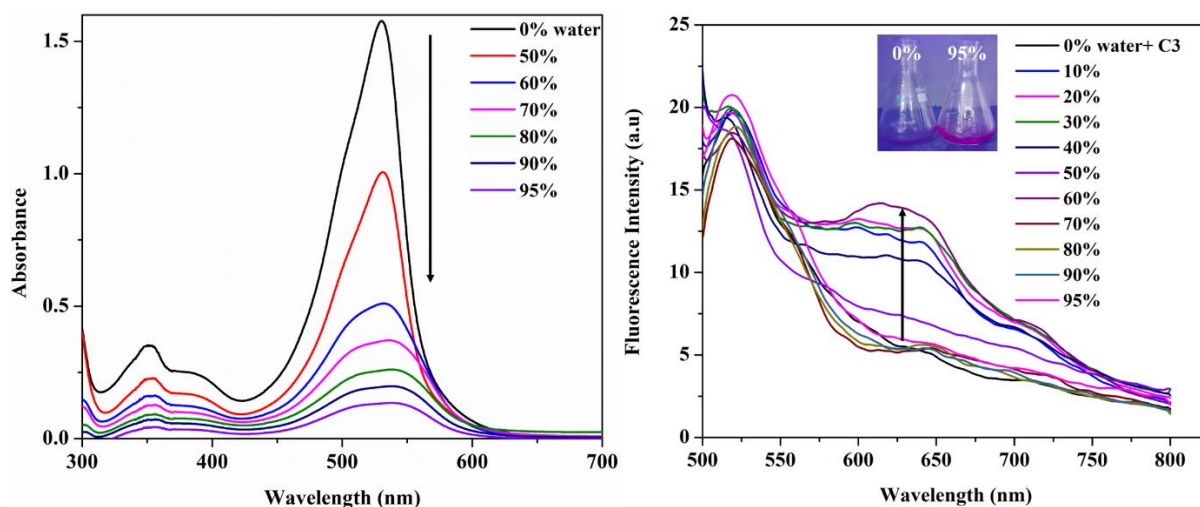

**Figure S19.** (a) Absorption spectra of **C3** in DMSO-H<sub>2</sub>O mixtures with different water fractions (10<sup>-5</sup> M); (b) Fluorescence spectra of **C3** in DMSO-H<sub>2</sub>O mixtures with different water fractions (10<sup>-6</sup> M,  $\lambda_{exc} = 480$  nm) (Inset: photograph of **C3** in DMSO/H<sub>2</sub>O mixture ( $f_w = 0\%$  and 95%), taken under 365 nm excitation of a UV lamp).

**Table S9.** Calculated  $\Phi_f$  in the aggregated state and AIE factor of *meso*-carbazole substituted BODIPYs

| BODIPY | $\Phi_f$ in the aggregated state | $\alpha_{AIE}$ |
|--------|----------------------------------|----------------|
| C1     | 0.52                             | 26             |
| C2     | 0.21                             | 21             |
| C3     | 0.015                            | 15             |

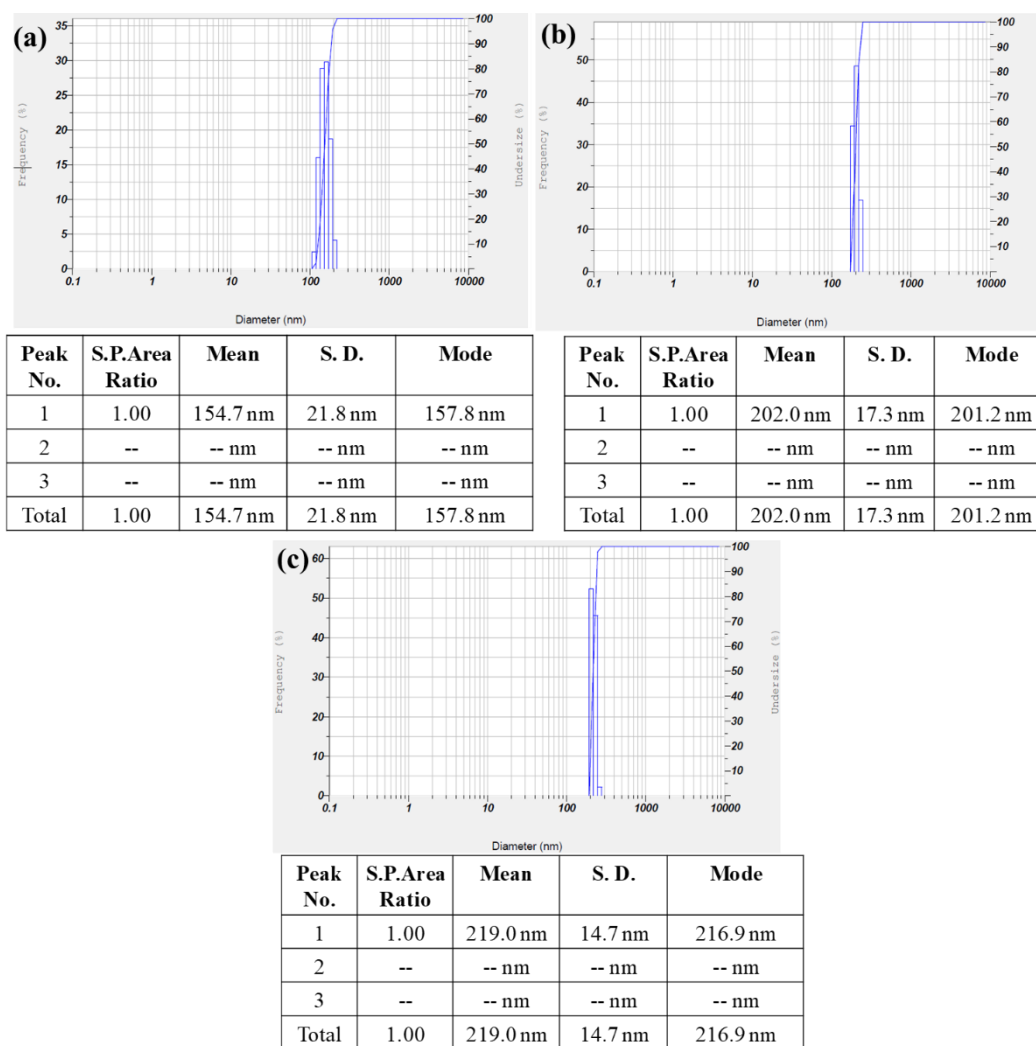

**Figure S20.** DLS images of (a) C1 ( $2.88 \times 10^{-5}$  M) and (b) C2 ( $2.39 \times 10^{-5}$  M) (c) C3 ( $2.88 \times 10^{-5}$  M) in 7:3 water-DMSO fraction.

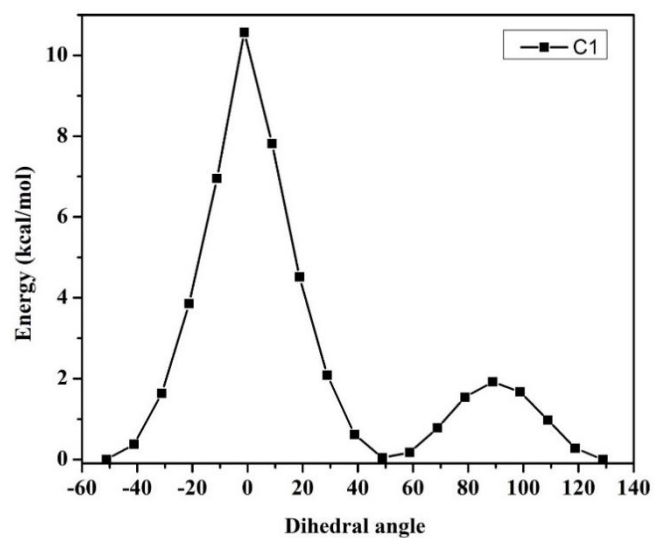

**Figure S21.** Plot between the dihedral angle of rotation between carbazole and BODIPY in **C1** vs energy (kcal/ mol) of rotation calculated at BP86/Def2-TZVPP level of theory.
